# Supplementary material
Source: MDPI journal article supplement (https://www.mdpi.com/2225-1154/11/5/110)
Supplement: s1 [file s1]

# SUPPLEMENTARY MATERIAL

**Table S1: Multiple Comparisons between compositional/contextual factors and cognitive factors**

| Variable                                                  | Mean Difference | Std. Error | Sig.  | 95% Confidence Interval |             |
|-----------------------------------------------------------|-----------------|------------|-------|-------------------------|-------------|
| Risk Perception                                           |                 |            |       | Lower Bound             | Upper Bound |
| <b>Sex (ref: Female)</b>                                  |                 |            |       |                         |             |
| Male                                                      | 0.066           | 0.235      | 0.797 | -0.364                  | 0.559       |
| <b>Age (ref: Young adult)</b>                             |                 |            |       |                         |             |
| Middle-aged adult                                         | 0.682           | 0.254      | 0.008 | 0.18                    | 1.18        |
| Older adult                                               | 0.986           | 0.353      | 0.005 | 0.29                    | 1.68        |
| <b>Education (ref: No formal education)</b>               |                 |            |       |                         |             |
| Primary                                                   | -0.383          | 0.354      | 0.279 | -1.08                   | 0.31        |
| Middle School/JHS                                         | -0.387          | 0.327      | 0.237 | -1.03                   | 0.26        |
| Secondary School and above                                | -0.870          | 0.438      | 0.048 | -1.73                   | -0.01       |
| <b>Household monthly income (GHC) (ref: below 100)</b>    |                 |            |       |                         |             |
| 101-500                                                   | 0.435           | 0.403      | 0.282 | -0.36                   | 1.23        |
| 501-999                                                   | 0.434           | 0.447      | 0.333 | -0.45                   | 1.31        |
| 1000 and above                                            | 0.324           | 0.477      | 0.498 | 0.61                    | 1.26        |
| <b>Hazard Experience (ref: No)</b>                        |                 |            |       |                         |             |
| Yes                                                       | 92.289          | 0.259      | 0.000 | 2.434                   | 3.452       |
| <b>Elevation (ref: below 4m)</b>                          |                 |            |       |                         |             |
| 4-9m                                                      | 0.275           | 0.278      | 0.323 | -0.27                   | 0.82        |
| <9m                                                       | 0.513           | 0.654      | 0.434 | -0.77                   | 1.80        |
| <b>Distance of house from Shoreline (ref: below 100m)</b> |                 |            |       |                         |             |
| 100-300m                                                  | -1.200          | 0.235      | 0.000 | -1.66                   | -0.74       |
| Above 300m                                                | 0.375           | 0.445      | 0.400 | -0.50                   | 1.25        |

| <b>Threat Appraisal</b>                                   |        |       |       |        |        |
|-----------------------------------------------------------|--------|-------|-------|--------|--------|
| <b>Sex (ref: Female)</b>                                  |        |       |       |        |        |
| Male                                                      | 0.886  | 0.357 | 0.347 | -1.085 | 0.319  |
| <b>Age (ref: Young adult)</b>                             |        |       |       |        |        |
| Middle-aged adult                                         | 0.040  | 0.392 | 0.919 | -0.81  | 0.73   |
| Older adult                                               | -0.547 | 0.544 | 0.316 | -1.62  | 0.52   |
| <b>Education (ref: No formal education)</b>               |        |       |       |        |        |
| Primary                                                   | -0.904 | 0.531 | 0.089 | -1.95  | 0.14   |
| Middle School/JHS                                         | 0.453  | 0.491 | 0.357 | -0.51  | 1.42   |
| Secondary School and above                                | 1.072  | 0.657 | 0.104 | -0.22  | 2.36   |
| <b>Household monthly income (GHC) (ref: below 100)</b>    |        |       |       |        |        |
| 101-500                                                   | -1.987 | 0.601 | 0.001 | -3.17  | -0.80  |
| 501-999                                                   | -2.562 | 0.667 | 0.000 | -3.87  | -1.25  |
| 1000 and above                                            | -1.269 | 0.712 | 0.076 | -2.67  | 0.13   |
| <b>Hazard Experience (ref: No)</b>                        |        |       |       |        |        |
| Yes                                                       | 5.520  | 0.453 | 0.019 | -2.430 | -0.649 |
| <b>Elevation (ref: below 4m)</b>                          |        |       |       |        |        |
| 4-9m                                                      | 0.306  | 0.423 | 0.471 | -0.53  | 1.14   |
| <9m                                                       | -0.444 | 0.997 | 0.656 | -2.41  | 1.52   |
| <b>Distance of house from Shoreline (ref: below 100m)</b> |        |       |       |        |        |
| 100-300m                                                  | 0.970  | 0.368 | 0.009 | 0.25   | 1.69   |
| Above 300m                                                | -0.779 | 0.698 | 0.265 | -2.15  | 0.59   |

### **Coping Appraisal**

|                               |       |       |       |        |       |
|-------------------------------|-------|-------|-------|--------|-------|
| <b>Sex (ref: Female)</b>      |       |       |       |        |       |
| Male                          | 1.364 | 0.343 | 0.244 | -1.050 | 0.298 |
| <b>Age (ref: Young adult)</b> |       |       |       |        |       |
| Middle-aged adult             | 0.157 | 0.377 | 0.678 | -0.58  | 0.90  |

|                                                           |        |       |       |        |       |
|-----------------------------------------------------------|--------|-------|-------|--------|-------|
| Older adult                                               | 0.194  | 0.523 | 0.711 | -0.84  | 1.22  |
| <b>Education (ref: No formal education)</b>               |        |       |       |        |       |
| Primary                                                   | -1.148 | 0.516 | 0.027 | -2.16  | -0.13 |
| Middle School/JHS                                         | -0.804 | 0.478 | 0.093 | -1.74  | 0.13  |
| Secondary School and above                                | -0.478 | 0.639 | 0.455 | -1.73  | 0.78  |
| <b>Household monthly income (GHC) (ref: below 100)</b>    |        |       |       |        |       |
| 101-500                                                   | -1.381 | 0.573 | 0.016 | -2.51  | -0.25 |
| 501-999                                                   | -2.585 | 0.636 | 0.000 | -3.84  | -1.34 |
| 1000 and above                                            | -0.500 | 0.679 | 0.462 | -1.83  | 0.83  |
| <b>Hazard Experience (ref: No)</b>                        |        |       |       |        |       |
| Yes                                                       | 1.129  | 0.440 | 0.289 | -1.704 | 0.026 |
| <b>Elevation (ref: below 4m)</b>                          |        |       |       |        |       |
| 4-9m                                                      | 0.713  | 0.405 | 0.079 | -0.08  | 1.51  |
| <9m                                                       | 0.011  | 0.955 | 0.991 | -1.87  | 1.89  |
| <b>Distance of house from Shoreline (ref: below 100m)</b> |        |       |       |        |       |
| 100-300m                                                  | 0.866  | 0.356 | 0.015 | 0.17   | 1.57  |
| Above 300m                                                | 0.587  | 0.675 | 0.385 | -0.74  | 1.91  |
